# Supplementary material
Source: PubMed Central journal article supplement (PMC5948158)
Supplement: NIHMS949483-supplement-Supp1.pdf [file NIHMS949483-supplement-Supp1.pdf]

**Supplementary Figure 1.** Association between height and waist-to-height ratio in child participants in the China Health and Nutrition Survey (1993-2011).

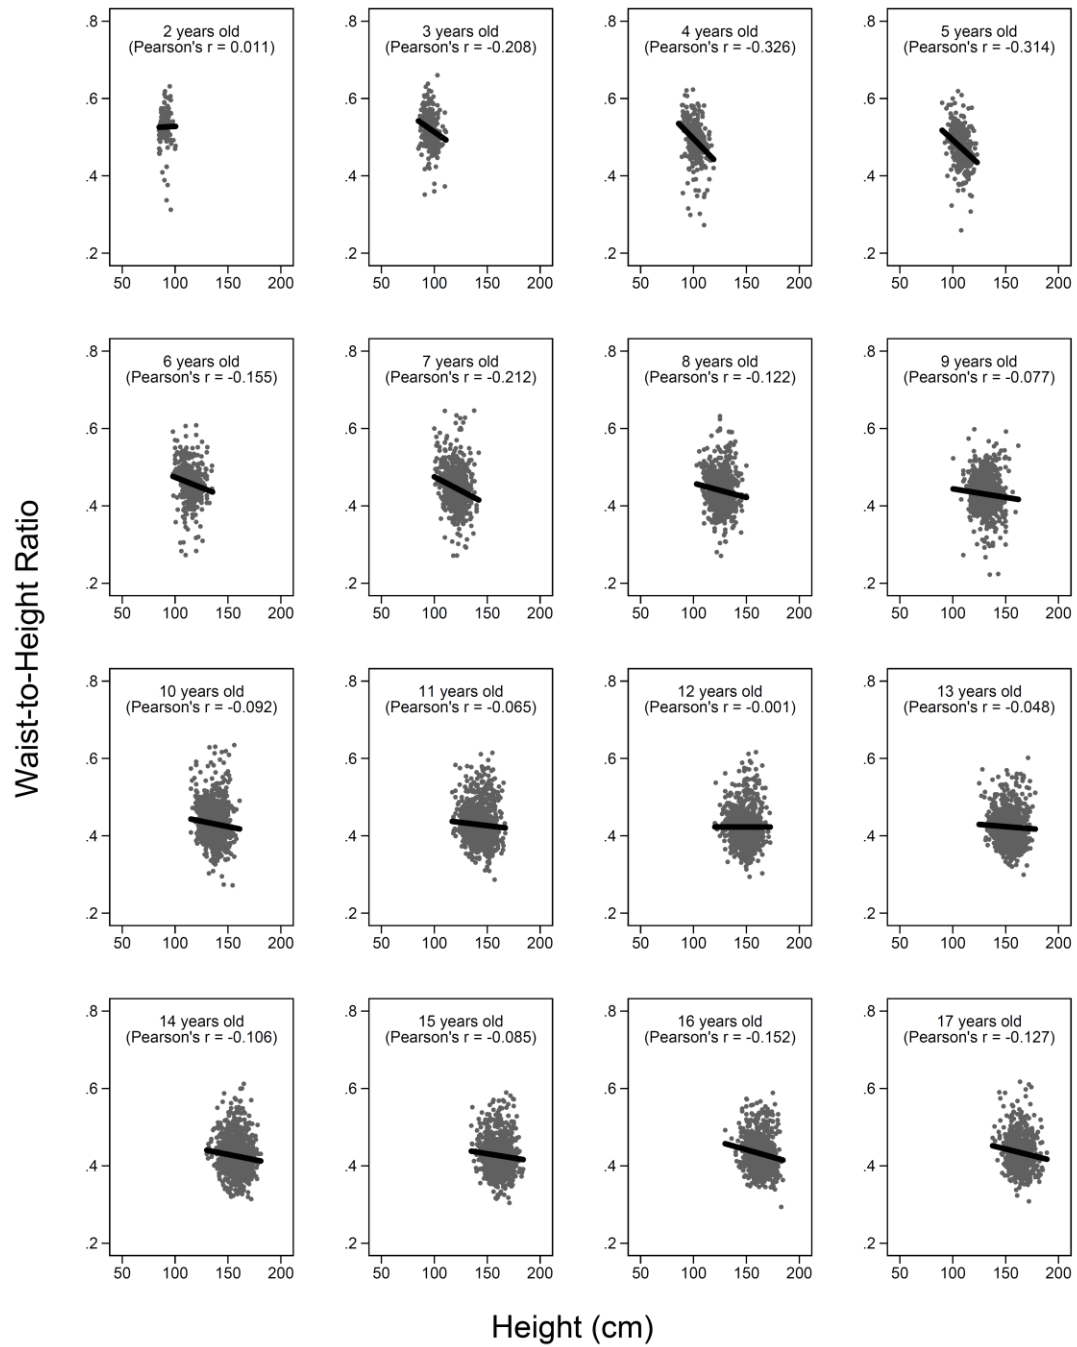

\* Child participants were stratified by age (2-17 years old) and presented in scatter plots of height and waist-to-height ratio.

**Supplementary Figure 2.** Results of multilevel analysis including adult individuals who participated in multiple survey rounds

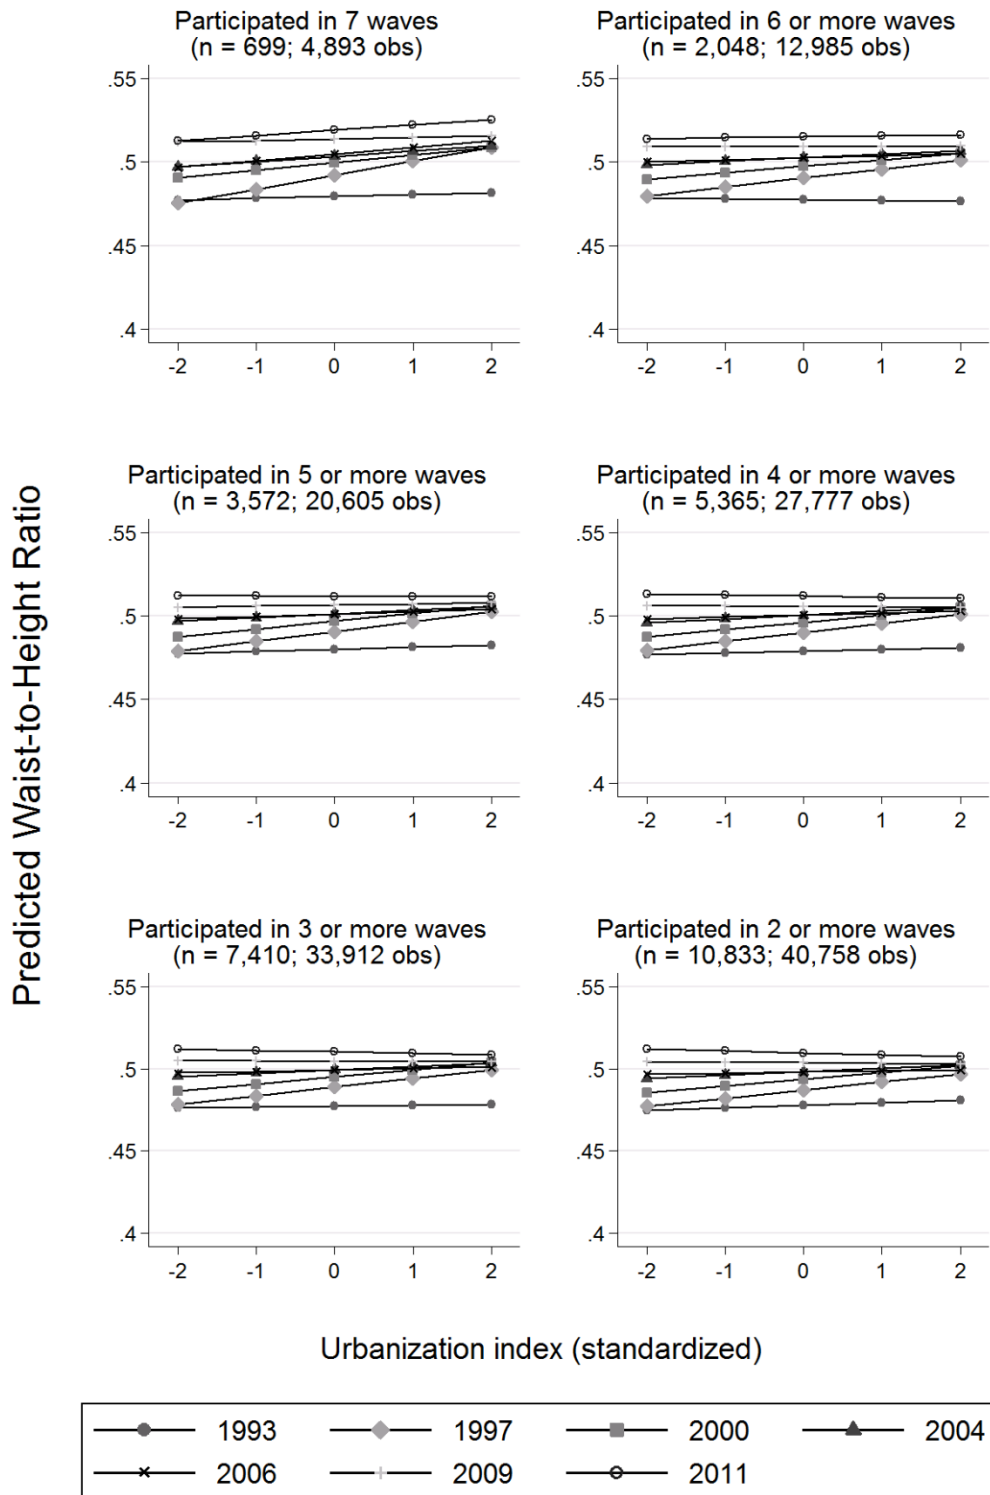

**Supplementary Figure 3.** Results of multilevel analysis including child individuals who participated in multiple survey rounds

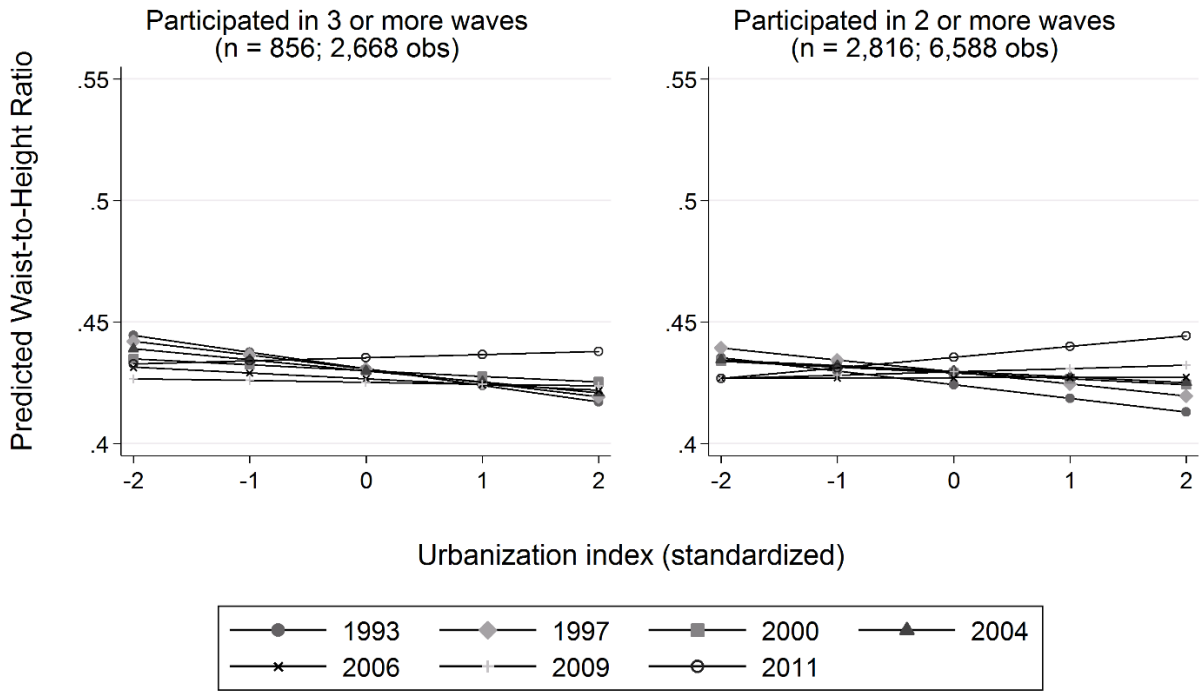

**Supplementary Table 1.** 12 components of the urbanization index in the China Health and Nutrition Survey

| <b>Components</b>                     | <b>Descriptions</b>                                                                                                                                                                                                                                                       |
|---------------------------------------|---------------------------------------------------------------------------------------------------------------------------------------------------------------------------------------------------------------------------------------------------------------------------|
| (1) Population density                | The number of people divided by community area (km <sup>2</sup> )                                                                                                                                                                                                         |
| (2) Types of economic activity        | Typical wage for ordinary male worker; Percent of the population who were engaged in non-agriculture                                                                                                                                                                      |
| (3) Traditional market                | Types of goods/markets available (grains, oil, meat, vegetables, fish, bean curd, milk, fabric and fuel); Distance to markets; The number of days of operation for markets                                                                                                |
| (4) Modern markets                    | The number of supermarket/hypermarkets, indoor restaurant, outdoor fixed and mobile food stall, fast food restaurant, ice cream parlor, bars, cafes, internet cafes, fruit and vegetable stores, bakeries.                                                                |
| (5) Transportation and infrastructure | Road type (paved, gravel, dirt); Distance to bus stop and train stop                                                                                                                                                                                                      |
| (6) Sanitation                        | Water treatment plant available to household; Absence of excreta in public space                                                                                                                                                                                          |
| (7) Communications                    | Percent of households with a television; Percent of households with a computer; Percent of households with a cell phone; Cinema in neighborhood; Newspaper available to the neighborhood; Telephone service available to community; Postal service available to community |
| (8) Housing                           | Average number of days a week that electricity is available to the community; Prevalence of indoor tap water; Prevalence of flush toilet; Prevalence of natural gas                                                                                                       |
| (9) Education                         | Average highest education attainment among adults.                                                                                                                                                                                                                        |
| (10) Diversity                        | Variation in education level; Variation in income level                                                                                                                                                                                                                   |
| (11) Health infrastructure            | Type of health clinic; Distance to health clinic; The number of health clinics in neighborhood                                                                                                                                                                            |
| (12) Social services                  | Preschool (0 – 3 years old); Type of insurance offered in community                                                                                                                                                                                                       |

\* Please refer to Jones-Smith and Popkin [14] for details.

**Supplementary Table 2.** Testing wave-to-wave differences in the interaction effect between urbanization index and study wave in relation to waist-to-height ratio in China Health and Nutrition Survey (1993 – 2011)

|                           | coef.  | 95%CI               | p-value |
|---------------------------|--------|---------------------|---------|
| <b>Adult participants</b> |        |                     |         |
| 1997 vs 1993              | 0.003  | (0.001 to 0.005)    | < 0.001 |
| 2000 vs 1997              | -0.001 | (-0.002 to 0.001)   | 0.240   |
| 2004 vs 2000              | -0.002 | (-0.004 to -0.001)  | 0.001   |
| 2006 vs 2004              | -0.001 | (-0.002 to 0.000)   | 0.060   |
| 2009 vs 2006              | -0.001 | (-0.003 to - 0.000) | 0.042   |
| 2011 vs 2009              | -0.001 | (-0.002 to 0.001)   | 0.359   |
| <b>Child participants</b> |        |                     |         |
| 1997 vs 1993              | 0.002  | (-0.001 to 0.006)   | 0.208   |
| 2000 vs 1997              | 0.002  | (-0.000 to 0.005)   | 0.106   |
| 2004 vs 2000              | -0.001 | (-0.004 to 0.002)   | 0.643   |
| 2006 vs 2004              | 0.002  | (-0.001 to 0.005)   | 0.180   |
| 2009 vs 2006              | -0.000 | (-0.003 to 0.004)   | 0.828   |
| 2011 vs 2009              | 0.001  | (-0.003 to 0.004)   | 0.776   |

**Supplementary Table 3.** Predicted waist-to-height ratios in relation to the degree of urbanization among study participants in the China Health and Nutrition Survey (1993 – 2011)

|                           | Urbanization index |       |       |       |       | Change in WHtR<br>per 1SD increase in<br>urbanization index |
|---------------------------|--------------------|-------|-------|-------|-------|-------------------------------------------------------------|
|                           | -2SD               | -1SD  | Mean  | +1SD  | +2SD  |                                                             |
| <b>Adult participants</b> |                    |       |       |       |       |                                                             |
| 1993                      | 0.473              | 0.475 | 0.477 | 0.479 | 0.481 | 0.002                                                       |
| 1997                      | 0.476              | 0.481 | 0.486 | 0.491 | 0.496 | 0.005                                                       |
| 2000                      | 0.484              | 0.488 | 0.492 | 0.496 | 0.500 | 0.004                                                       |
| 2004                      | 0.492              | 0.494 | 0.496 | 0.498 | 0.500 | 0.002                                                       |
| 2006                      | 0.495              | 0.495 | 0.496 | 0.496 | 0.497 | 0.001                                                       |
| 2009                      | 0.503              | 0.502 | 0.501 | 0.501 | 0.500 | -0.001                                                      |
| 2011                      | 0.510              | 0.509 | 0.507 | 0.506 | 0.504 | -0.001                                                      |
| <b>Child participants</b> |                    |       |       |       |       |                                                             |
| 1993                      | 0.435              | 0.429 | 0.423 | 0.417 | 0.411 | -0.006                                                      |
| 1997                      | 0.436              | 0.432 | 0.429 | 0.425 | 0.421 | -0.004                                                      |
| 2000                      | 0.432              | 0.431 | 0.429 | 0.428 | 0.426 | -0.001                                                      |
| 2004                      | 0.435              | 0.433 | 0.431 | 0.429 | 0.427 | -0.002                                                      |
| 2006                      | 0.428              | 0.428 | 0.428 | 0.428 | 0.428 | 0.000                                                       |
| 2009                      | 0.429              | 0.430 | 0.431 | 0.431 | 0.432 | 0.001                                                       |
| 2011                      | 0.434              | 0.435 | 0.437 | 0.438 | 0.439 | 0.001                                                       |
